# Supplementary material
Source: PubMed Central journal article supplement (PMC6441366)
Supplement: NIHMS1519519-supplement-1.pdf [file NIHMS1519519-supplement-1.pdf]

Supplemental Table S1: Mass spectrometric conditions for quantitation of the sex-steroid hormones in the positive mode.

| Panel        | Sheath Gas | Auxillary Gas | Heated Capillary (°C) | Spray Voltage (kV) | Sex-Steroid Hormone         | Precursor (m/z) | Fragment (m/z) | Collision Energy (V) | Tube Lens Offset (V) |
|--------------|------------|---------------|-----------------------|--------------------|-----------------------------|-----------------|----------------|----------------------|----------------------|
| Progestogens | 60         | 10            | 349                   | 3                  | Etonogestrel                | 325             | 257            | 21                   | 102                  |
|              |            |               |                       |                    | Levonorgestrel              | 313             | 245            | 18                   | 99                   |
|              |            |               |                       |                    | Medroxyprogesterone Acetate | 387             | 327            | 17                   | 114                  |
|              |            |               |                       |                    | Norethindrone               | 299             | 231            | 17                   | 104                  |
|              |            |               |                       |                    | Progesterone                | 315             | 109            | 22                   | 114                  |
|              |            |               |                       |                    | Testosterone-d3             | 292             | 97             | 22                   | 76                   |
| Estrogens    | 20         | 34            | 350                   | 4                  | Estradiol                   | 506             | 171            | 35                   | 63                   |
|              |            |               |                       |                    | Ethinyl Estradiol           | 530             | 171            | 35                   | 63                   |
|              |            |               |                       |                    | Estradiol-d5                | 511             | 171            | 35                   | 63                   |
